# Supplementary material for: Genetic structure of Anopheles gambiae populations on islands in northwestern Lake Victoria, Uganda
Source: PubMed Central journal article supplement (PMC1327676; doi:10.1186/1475-2875-4-59), 2005-12-09
Supplement: 1475-2875-4-59-S1.pdf [file 1475-2875-4-59-S1.pdf]

Additional file 1- Details and variability summary of 17 yr 1 microsatellites

| Locus                 |      | NZD<br>( N= 36 ) | BLA<br>( N= 36 ) | SYA<br>( N= 32 ) | BKA<br>( N=33 ) | WLA<br>( N= 20 ) | EBB<br>( N= 32 ) | Citation or primer<br>sequence Fwd/ Rev      |
|-----------------------|------|------------------|------------------|------------------|-----------------|------------------|------------------|----------------------------------------------|
| <u>ID1</u>            | Alle | 4                | 4                | 4                | 5               | 2                | 5                | Lehmann et al [21]                           |
| X : 1D                | Ho   | 0.5              | 0.42             | 0.52             | 0.47            | 0.5              | 0.59             |                                              |
| [ CCA ] <sub>5</sub>  | He   | 0.43             | 0.43             | 0.53             | 0.46            | 0.49             | 0.6              |                                              |
|                       | Fis  | -0.16            | 0.03             | 0.01             | -0.02           | -0.03            | -0.01            |                                              |
| <u>H99</u>            | Alle | 6                | 6                | 4                | 6               | 4                | 6                | Wang et al [37].                             |
| X : 2C                | Ho   | 0.64             | 0.58             | 0.5              | 0.69            | 0.8              | 0.72             |                                              |
| [ GT ] <sub>8</sub>   | He   | 0.73             | 0.77             | 0.59             | 0.79            | 0.76             | 0.76             |                                              |
|                       | Fis  | 0.12             | 0.23             | 0.14             | 0.13            | -0.07            | 0.04             |                                              |
| <u>H53</u>            | Alle | 6                | 6                | 6                | 6               | 7                | 7                | Wang et al [37]                              |
| X : 4A                | Ho   | 0.71             | 0.72             | 0.63             | 0.81            | 0.8              | 0.74             |                                              |
| [ GT ] <sub>7</sub>   | He   | 0.79             | 0.78             | 0.77             | 0.75            | 0.81             | 0.77             |                                              |
|                       | Fis  | 0.09             | 0.06             | 0.17             | 0.1             | 0.01             | 0.03             |                                              |
| <u>H145C/D</u>        | Alle | 4                | 4                | 4                | 4               | 5                | 6                | Wang et al [37]                              |
| X : 4C                | Ho   | 0.61             | 0.51             | 0.59             | 0.52            | 0.53             | 0.59             |                                              |
| [ GT ] <sub>11</sub>  | He   | 0.74             | 0.73             | 0.72             | 0.63            | 0.72             | 0.79             |                                              |
|                       | Fis  | 0.17             | <b>0.29</b>      | 0.17             | 0.17            | 0.26             | <b>0.24</b>      |                                              |
| <u>22C1</u>           | Alle | 5                | 6                | 5                | 4               | 5                | 6                | Wang et al [37]                              |
| 2L : 22F              | Ho   | 0.53             | 0.66             | 0.56             | 0.72            | 0.7              | 0.68             |                                              |
| [ TG ] <sub>7</sub>   | He   | 0.69             | 0.69             | 0.72             | 0.66            | 0.64             | 0.72             |                                              |
|                       | Fis  | <b>0.23</b>      | 0.04             | <b>0.22</b>      | 0.11            | 0.11             | 0.05             |                                              |
| <u>MBP1A</u>          | Alle | 7                | 7                | 8                | 7               | 4                | 8                | atgcgatgaatcttgcttc /<br>ggaattcgggacaagatga |
| 2L : 23A              | Ho   | 0.58             | 0.57             | 0.56             | 0.38            | 0.7              | 0.53             |                                              |
| [ CA ] <sub>6</sub>   | He   | 0.7              | 0.53             | 0.59             | 0.7             | 0.62             | 0.53             |                                              |
|                       | Fis  | 0.17             | -0.08            | 0.04             | <b>0.46</b>     | -0.15            | -0.01            |                                              |
| <u>MBP1B</u>          | Alle | 10               | 9                | 10               | 12              | 8                | 8                | ggcaggaaggttttggaa /<br>catcagcaacgctagtggaa |
| 2L : 23A              | Ho   | 0.36             | 0.54             | 0.5              | 0.37            | 0.67             | 0.47             |                                              |
| [ TG ] <sub>11</sub>  | He   | 0.86             | 0.77             | 0.89             | 0.89            | 0.83             | 0.77             |                                              |
|                       | Fis  | <b>0.58</b>      | <b>0.29</b>      | <b>0.43</b>      | <b>0.58</b>     | 0.19             | <b>0.39</b>      |                                              |
| <u>H117</u>           | Alle | 5                | 5                | 5                | 5               | 7                | 5                | Wang et al [37]                              |
| 2L : 28C              | Ho   | 0.31             | 0.43             | 0.69             | 0.7             | 0.65             | 0.63             |                                              |
| [ GT ] <sub>6+4</sub> | He   | 0.74             | 0.68             | 0.73             | 0.74            | 0.84             | 0.76             |                                              |
|                       | Fis  | <b>0.58</b>      | <b>0.37</b>      | 0.05             | 0.05            | 0.21             | 0.17             |                                              |
