# Supplementary material for: Genetic structure of Anopheles gambiae populations on islands in northwestern Lake Victoria, Uganda
Source: PubMed Central journal article supplement (PMC1327676; doi:10.1186/1475-2875-4-59), 2005-12-09
Supplement: 1475-2875-4-59-S2.pdf [file 1475-2875-4-59-S2.pdf]

Additional file 2- Details and variability summary of 17 yr 1 microsatellites continuation

|                       |      |             |             |             |             |             |             |                    |
|-----------------------|------|-------------|-------------|-------------|-------------|-------------|-------------|--------------------|
| H197                  | Alle | 10          | 10          | 9           | 8           | 8           | 8           | Wang et al [37]    |
| 2R : 9A               | Ho   | 0.8         | 0.79        | 0.77        | 0.85        | 0.65        | 0.6         |                    |
| [ GT ] <sub>8</sub>   | He   | 0.84        | 0.88        | 0.79        | 0.79        | 0.78        | 0.82        |                    |
|                       | Fis  | 0.04        | 0.09        | 0.02        | -0.08       | 0.15        | 0.27        |                    |
| <u>H79</u>            | Alle | 4           | 4           | 5           | 5           | 4           | 4           | Zheng et al [38]   |
| 2R : 11C              | Ho   | 0.69        | 0.71        | 0.58        | 0.67        | 0.6         | 0.71        |                    |
| [GT ] <sub>20</sub>   | He   | 0.7         | 0.7         | 0.73        | 0.66        | 0.61        | 0.68        |                    |
|                       | Fis  | 0.01        | -0.04       | <b>0.2</b>  | -0.02       | 0.01        | -0.06       |                    |
| <u>H577</u>           | Alle | 8           | 8           | 7           | 7           | 5           | 8           | Zheng et al [38]   |
| 3L : 42A              | Ho   | 0.57        | 0.61        | 0.68        | 0.64        | 0.7         | 0.65        |                    |
| [ GT ] <sub>16</sub>  | He   | 0.6         | 0.7         | 0.74        | 0.69        | 0.72        | 0.69        |                    |
|                       | Fis  | 0.03        | 0.12        | 0.08        | 0.06        | 0.02        | 0.06        |                    |
| H544                  | Alle | 4           | 5           | 6           | 7           | 5           | 7           | Wang et al [37]    |
| 3L : 42B              | Ho   | 0.22        | 0.22        | 0.2         | 0.33        | 0.3         | 0.41        |                    |
| [ GT ] <sub>7</sub>   | He   | 0.73        | 0.65        | 0.71        | 0.78        | 0.74        | 0.76        |                    |
|                       | Fis  | <b>0.69</b> | <b>0.66</b> | <b>0.72</b> | <b>0.57</b> | <b>0.59</b> | <b>0.46</b> |                    |
| <u>H817</u>           | Alle | 5           | 6           | 6           | 5           | 6           | 6           | Zheng et al [38]   |
| 3L : 44B              | Ho   | 0.47        | 0.62        | 0.75        | 0.61        | 0.6         | 0.66        |                    |
| [ GT ] <sub>8</sub>   | He   | 0.58        | 0.72        | 0.66        | 0.66        | 0.65        | 0.75        |                    |
|                       | Fis  | 0.19        | 0.13        | -0.14       | 0.07        | 0.06        | 0.11        |                    |
| <u>H93</u>            | Alle | 9           | 12          | 8           | 12          | 7           | 10          | Zheng et al [38]   |
| 3R : 29A              | Ho   | 0.83        | 0.64        | 0.63        | 0.76        | 0.8         | 0.71        |                    |
| [ GT ] <sub>4+7</sub> | He   | 0.82        | 0.87        | 0.85        | 0.86        | 0.78        | 0.86        |                    |
|                       | Fis  | -0.03       | <b>0.26</b> | <b>0.26</b> | 0.11        | -0.04       | 0.17        |                    |
| 29C1                  | Alle | 2           | 4           | 4           | 4           | 2           | 2           | Lehmann et al [21] |
| 3R : 29C              | Ho   | 0.46        | 0.51        | 0.43        | 0.42        | 0.35        | 0.55        |                    |
| [ TGA ] <sub>11</sub> | He   | 0.5         | 0.52        | 0.56        | 0.55        | 0.36        | 0.46        |                    |
|                       | Fis  | 0.07        | 0.01        | <b>0.23</b> | <b>0.22</b> | 0.01        | -0.22       |                    |
| <u>H158</u>           | Alle | 8           | 8           | 8           | 8           | 7           | 8           | Wang et al [37]    |
| 3R : 32D              | Ho   | 0.64        | 0.75        | 0.72        | 0.67        | 0.75        | 0.66        |                    |
| [ GT ] <sub>12</sub>  | He   | 0.64        | 0.72        | 0.66        | 0.68        | 0.78        | 0.75        |                    |
|                       | Fis  | -0.01       | -0.06       | -0.1        | 0.01        | 0.03        | 0.12        |                    |
| <u>33C1</u>           | Alle | 5           | 4           | 3           | 3           | 5           | 5           | Lehmann et al [21] |
| 3R : 33C              | Ho   | 0.58        | 0.31        | 0.31        | 0.3         | 0.55        | 0.48        |                    |
| [ AGC ] <sub>6</sub>  | He   | 0.68        | 0.47        | 0.39        | 0.56        | 0.76        | 0.66        |                    |
|                       | Fis  | 0.13        | <b>0.33</b> | 0.19        | <b>0.45</b> | 0.27        | <b>0.26</b> |                    |
