# Supplementary material for: Genetic structure of Anopheles gambiae populations on islands in northwestern Lake Victoria, Uganda
Source: PubMed Central journal article supplement (PMC1327676; doi:10.1186/1475-2875-4-59), 2005-12-09
Supplement: 1475-2875-4-59-S4.pdf [file 1475-2875-4-59-S4.pdf]

Additional file 4- Yr1 population  $F_{ST}$  differentiations excluding loci that showed evidence of null alleles

† Denotes mainland populations  
Non significant pair wise values are underlined.

---

|                 | NZ           | BL           | SY    | BK    | WL <sup>†</sup> |
|-----------------|--------------|--------------|-------|-------|-----------------|
| BL              | <u>0.000</u> | -            |       |       |                 |
| SY              | <u>0.018</u> | <u>0.008</u> | -     |       |                 |
| BK              | <u>0.013</u> | <u>0.015</u> | 0.021 | -     |                 |
| WL <sup>†</sup> | 0.046        | 0.024        | 0.041 | 0.038 | -               |
| EB <sup>†</sup> | 0.040        | 0.034        | 0.051 | 0.022 | <u>0.016</u>    |

---
